# Supplementary material
Source: PubMed Central journal article supplement (PMC6946850)
Supplement: NIHMS1540568-supplement-2.pdf [file NIHMS1540568-supplement-2.pdf]

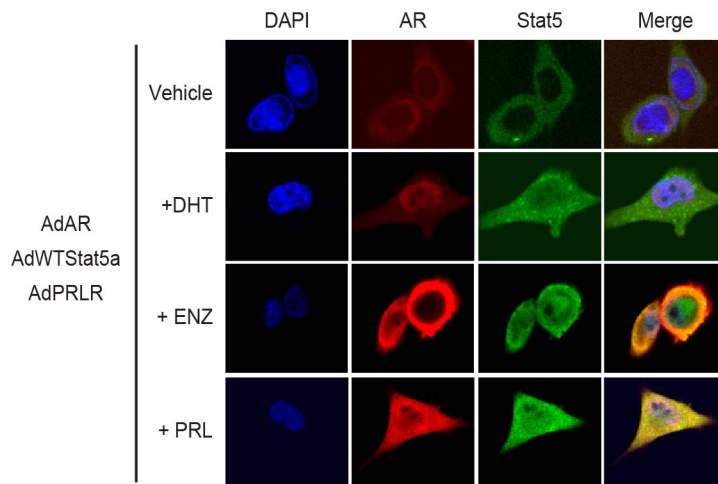

**Supplementary Figure 1. ENZ-induced activated Stat5 is capable of nuclear translocation in PC cells.** AR, wild-type Stat5, and prolactin receptor were expressed in PC-3 cells (AR- and Stat5-negative) using adenovirus as an expression vector (Ad), serum-starved for 12 hours and treated with dihydrotestosterone (DHT; 1 nM), bicalutamide (BIC; 10  $\mu$ M), ENZ (ENZ; 10  $\mu$ M), prolactin (PRL; 10 nM) or vehicle for 1 hour. Immunostaining shows nuclear DNA (DAPI), Stat5, AR and merged imaging of AR and Stat5 (image magnification 40X; scale bar: 50 $\mu$ m).
