# Supplementary material
Source: PubMed Central journal article supplement (PMC6946850)
Supplement: NIHMS1540568-supplement-3.pdf [file NIHMS1540568-supplement-3.pdf]

**A**

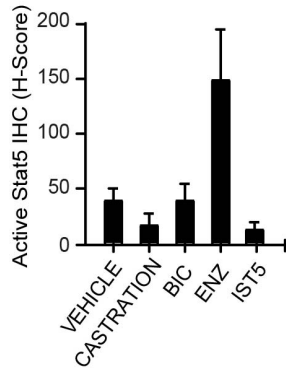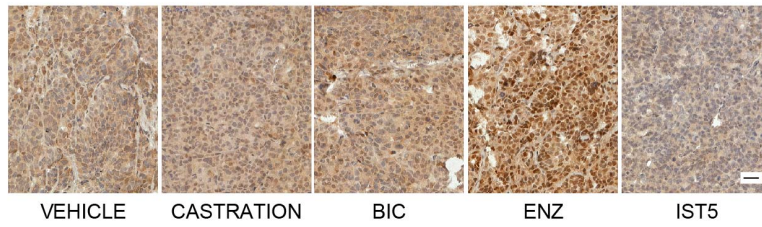

**B**

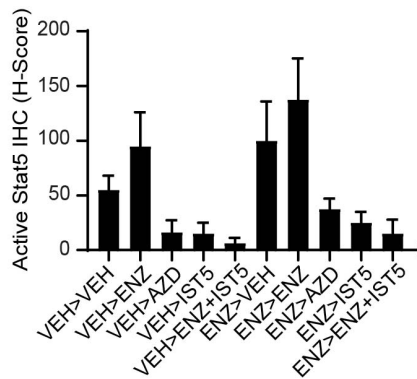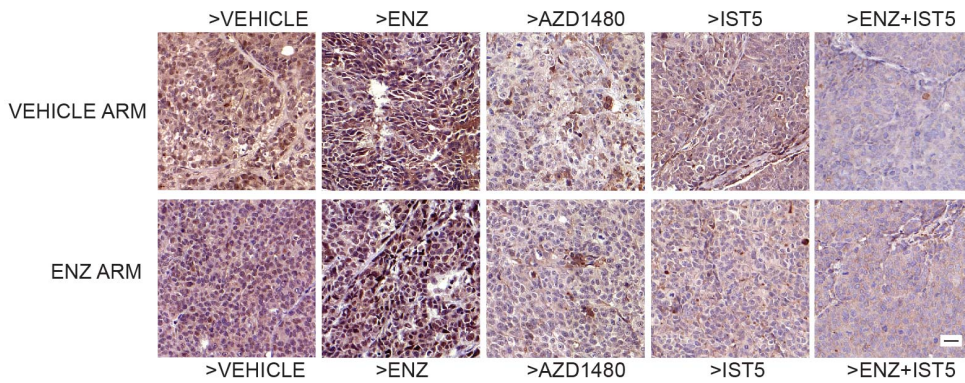

**Supplementary Figure 2. Levels of nuclear Stat5 in xenograft tumors. (A)** IST5-002 decreases nuclear Stat5 levels in CWR22Pc xenograft tumors. Nuclear Stat5 levels were detected by immunostaining of paraffin-embedded tissue sections of tumors using biotin-streptavidin-amplified peroxidase-antiperoxidase immunodetection. Quantification of nuclear Stat5 -positive cells is shown as a graph (top panel) and as pictures of representative immunostainings (lower panel). **(B)** Sequential, second-line therapy with ENZ, AZD1480, IST5-002 and ENZ +IST5-002 decreases nuclear Stat5 levels in androgen-sensitive and ENZ-resistant CWR22Pc xenograft tumors, shown by quantification of nuclear Stat5-positive cells (top panel) as well as representative histologies (bottom panel) (image magnification 40X; scale bar: 50 $\mu$ m).
